# Supplementary material
Source: publisher figshare collection journal article supplement (https://acs.figshare.com/ndownloader/files/3837139)
Supplement: Supplementary file 1 [file 3837139]

## Sheet: SUPPLEMENTAL__TABLE__3__
Mass [m/z]	CS [z]	Polarity	NCE	Comment
522.302	2	Positive	0.3	ARTKQTAR
529.31	2	Positive	0.3	ARme1TKQTAR
408.733	2	Positive	0.3	TKQTAR
415.741	2	Positive	0.3	TKme1QTAR
394.735	2	Positive	0.3	TKme2QTAR
401.743	2	Positive	0.3	TKme3QTAR
448.716	2	Positive	0.3	TphosKQTAR
535.304	2	Positive	0.3	KSTGGKAPR
542.312	2	Positive	0.3	Kme1STGGKAPR
357.205	3	Positive	0.3	KSTGGKAPR
361.877	3	Positive	0.3	Kme1STGGKAPR
521.307	2	Positive	0.3	Kme2STGGKAPR
528.314	2	Positive	0.3	Kme3STGGKAPR
528.296	2	Positive	0.3	KacSTGGKAPR
528.296	2	Positive	0.3	KSTGGKacAPR
535.304	2	Positive	0.3	Kme1STGGKacAPR
514.299	2	Positive	0.3	Kme2STGGKacAPR
521.306	2	Positive	0.3	Kme3STGGKacAPR
521.288	2	Positive	0.3	KacSTGGKacAPR
575.287	2	Positive	0.3	KSphosTGGKAPR
582.295	2	Positive	0.3	Kme1SphosTGGKAPR
561.29	2	Positive	0.3	Kme2SphosTGGKAPR
568.297	2	Positive	0.3	Kme3SphosTGGKAPR
347.874	3	Positive	0.3	Kme2STGGKAPR
352.545	3	Positive	0.3	Kme3STGGKAPR
352.533	3	Positive	0.3	KacSTGGKAPR
352.533	3	Positive	0.3	KSTGGKacAPR
357.205	3	Positive	0.3	Kme1STGGKacAPR
343.202	3	Positive	0.3	Kme2STGGKacAPR
347.873	3	Positive	0.3	Kme3STGGKacAPR
347.861	3	Positive	0.3	KacSTGGKacAPR
383.861	3	Positive	0.3	KSphosTGGKAPR
388.533	3	Positive	0.3	Kme1SphosTGGKAPR
374.529	3	Positive	0.3	Kme2SphosTGGKAPR
379.201	3	Positive	0.3	Kme3SphosTGGKAPR
577.849	2	Positive	0.3	KQLATKAAR
584.857	2	Positive	0.3	Kme1QLATKAAR
584.857	2	Positive	0.3	KQLATKme1AAR
570.841	2	Positive	0.3	KacQLATKAAR
570.841	2	Positive	0.3	KQLATKacAAR
563.833	2	Positive	0.3	KacQLATKacAAR
385.568	3	Positive	0.3	KQLATKAAR
390.24	3	Positive	0.3	Kme1QLATKAAR
390.24	3	Positive	0.3	KQLATKme1AAR
380.896	3	Positive	0.3	KacQLATKAAR
380.896	3	Positive	0.3	KQLATKacAAR
376.224	3	Positive	0.3	KacQLATKacAAR
829.473	2	Positive	0.3	KSAPATGGVKKPHR
836.481	2	Positive	0.3	Kme1SAPATGGVKKPHR
815.476	2	Positive	0.3	Kme2SAPATGGVKKPHR
822.483	2	Positive	0.3	Kme3SAPATGGVKKPHR
829.473	2	Positive	0.3	KacSAPATGGVKme1KPHR
808.468	2	Positive	0.3	KacSAPATGGVKme2KPHR
822.465	2	Positive	0.3	KacSAPATGGVKKPHR
836.481	2	Positive	0.3	KSAPATGGVKme1KPHR
815.476	2	Positive	0.3	KSAPATGGVKme2KPHR
822.483	2	Positive	0.3	KSAPATGGVKme3KPHR
843.489	2	Positive	0.3	Kme1SAPATGGVKme1KPHR
822.483	2	Positive	0.3	Kme1SAPATGGVKme2KPHR
829.491	2	Positive	0.3	Kme1SAPATGGVKme3KPHR
822.483	2	Positive	0.3	Kme2SAPATGGVKme1KPHR
801.478	2	Positive	0.3	Kme2SAPATGGVKme2KPHR
808.486	2	Positive	0.3	Kme2SAPATGGVKme3KPHR
829.491	2	Positive	0.3	Kme3SAPATGGVKme1KPHR
808.486	2	Positive	0.3	Kme3SAPATGGVKme2KPHR
815.494	2	Positive	0.3	Kme3SAPATGGVKme3KPHR
869.456	2	Positive	0.3	KSphosAPATGGVKKPHR
876.464	2	Positive	0.3	Kme1SphosAPATGGVKKPHR
855.459	2	Positive	0.3	Kme2SphosAPATGGVKKPHR
862.466	2	Positive	0.3	Kme3SphosAPATGGVKKPHR
553.318	3	Positive	0.3	KSAPATGGVKKPHR
557.99	3	Positive	0.3	Kme1SAPATGGVKKPHR
543.987	3	Positive	0.3	Kme2SAPATGGVKKPHR
548.658	3	Positive	0.3	Kme3SAPATGGVKKPHR
553.318	3	Positive	0.3	KacSAPATGGVKme1KPHR
539.315	3	Positive	0.3	KacSAPATGGVKme2KPHR
548.646	3	Positive	0.3	KacSAPATGGVKKPHR
557.99	3	Positive	0.3	KSAPATGGVKme1KPHR
543.987	3	Positive	0.3	KSAPATGGVKme2KPHR
548.658	3	Positive	0.3	KSAPATGGVKme3KPHR
562.662	3	Positive	0.3	Kme1SAPATGGVKme1KPHR
548.658	3	Positive	0.3	Kme1SAPATGGVKme2KPHR
553.33	3	Positive	0.3	Kme1SAPATGGVKme3KPHR
548.658	3	Positive	0.3	Kme2SAPATGGVKme1KPHR
534.655	3	Positive	0.3	Kme2SAPATGGVKme2KPHR
539.327	3	Positive	0.3	Kme2SAPATGGVKme3KPHR
553.33	3	Positive	0.3	Kme3SAPATGGVKme1KPHR
539.327	3	Positive	0.3	Kme3SAPATGGVKme2KPHR
543.998	3	Positive	0.3	Kme3SAPATGGVKme3KPHR
579.973	3	Positive	0.3	KSphosAPATGGVKKPHR
584.645	3	Positive	0.3	Kme1SphosAPATGGVKKPHR
570.642	3	Positive	0.3	Kme2SphosAPATGGVKKPHR
575.314	3	Positive	0.3	Kme3SphosAPATGGVKKPHR
837.47	2	Positive	0.3	KSAPSTGGVKKPHR
844.478	2	Positive	0.3	Kme1SAPSTGGVKKPHR
823.473	2	Positive	0.3	Kme2SAPSTGGVKKPHR
830.481	2	Positive	0.3	Kme3SAPSTGGVKKPHR
830.463	2	Positive	0.3	KacSAPSTGGVKKPHR
837.471	2	Positive	0.3	KacSAPSTGGVKme1KPHR
816.466	2	Positive	0.3	Kme2SAPSTGGVKacKPHR
844.478	2	Positive	0.3	KSAPSTGGVKme1KPHR
823.473	2	Positive	0.3	KSAPSTGGVKme2KPHR
830.481	2	Positive	0.3	KSAPSTGGVKme3KPHR
851.486	2	Positive	0.3	Kme1SAPSTGGVKme1KPHR
830.481	2	Positive	0.3	Kme1SAPSTGGVKme2KPHR
837.489	2	Positive	0.3	Kme1SAPSTGGVKme3KPHR
830.481	2	Positive	0.3	Kme2SAPSTGGVKme1KPHR
809.476	2	Positive	0.3	Kme2SAPSTGGVKme2KPHR
816.484	2	Positive	0.3	Kme2SAPSTGGVKme3KPHR
837.489	2	Positive	0.3	Kme3SAPSTGGVKme1KPHR
816.483	2	Positive	0.3	Kme3SAPSTGGVKme2KPHR
823.491	2	Positive	0.3	Kme3SAPSTGGVKme3KPHR
877.454	2	Positive	0.3	KSphosSAPSTGGVKKPHR
884.462	2	Positive	0.3	Kme1SphosSAPSTGGVKKPHR
863.457	2	Positive	0.3	Kme2SphosAPSTGGVKKPHR
870.464	2	Positive	0.3	Kme3SphosAPSTGGVKKPHR
558.65	3	Positive	0.3	KSAPSTGGVKKPHR
563.322	3	Positive	0.3	Kme1SAPSTGGVKKPHR
549.318	3	Positive	0.3	Kme2SAPSTGGVKKPHR
553.99	3	Positive	0.3	Kme3SAPSTGGVKKPHR
553.978	3	Positive	0.3	KacSAPSTGGVKKPHR
558.65	3	Positive	0.3	KacSAPSTGGVKme1KPHR
544.646	3	Positive	0.3	Kme2SAPSTGGVKacKPHR
563.322	3	Positive	0.3	KSAPSTGGVKme1KPHR
549.318	3	Positive	0.3	KSAPSTGGVKme2KPHR
553.99	3	Positive	0.3	KSAPSTGGVKme3KPHR
567.994	3	Positive	0.3	Kme1SAPSTGGVKme1KPHR
553.99	3	Positive	0.3	Kme1SAPSTGGVKme2KPHR
558.662	3	Positive	0.3	Kme1SAPSTGGVKme3KPHR
553.99	3	Positive	0.3	Kme2SAPSTGGVKme1KPHR
539.987	3	Positive	0.3	Kme2SAPSTGGVKme2KPHR
544.659	3	Positive	0.3	Kme2SAPSTGGVKme3KPHR
558.662	3	Positive	0.3	Kme3SAPSTGGVKme1KPHR
544.658	3	Positive	0.3	Kme3SAPSTGGVKme2KPHR
549.33	3	Positive	0.3	Kme3SAPSTGGVKme3KPHR
585.305	3	Positive	0.3	KSphosSAPSTGGVKKPHR
589.977	3	Positive	0.3	Kme1SphosSAPSTGGVKKPHR
575.974	3	Positive	0.3	Kme2SphosAPSTGGVKKPHR
580.646	3	Positive	0.3	Kme3SphosAPSTGGVKKPHR
681.886	2	Positive	0.3	YQKSTELLIR
674.877	2	Positive	0.3	YQKacSTELLIR
454.926	3	Positive	0.3	YQKSTELLIR
450.254	3	Positive	0.3	YQKacSTELLIR
724.376	2	Positive	0.3	EIAQDFKTDLR
731.383	2	Positive	0.3	EIAQDFKme1TDLR
710.378	2	Positive	0.3	EIAQDFKme2TDLR
717.386	2	Positive	0.3	EIAQDFKme3TDLR
483.253	3	Positive	0.3	EIAQDFKTDLR
487.925	3	Positive	0.3	EIAQDFKme1TDLR
473.921	3	Positive	0.3	EIAQDFKme2TDLR
478.593	3	Positive	0.3	EIAQDFKme3TDLR
544.815	2	Positive	0.3	YRPGTVALR
363.546	3	Positive	0.3	YRPGTVALR
919.024	2	Positive	0.3	SacGRGKGGKGLGKGGAKR
926.032	2	Positive	0.3	SacGRme1GKGGKGLGKGGAKR
613.019	3	Positive	0.3	SacGRGKGGKGLGKGGAKR
617.69	3	Positive	0.3	SacGRme1GKGGKGLGKGGAKR
775.955	2	Positive	0.3	GKGGKGLGKGGAKR
768.947	2	Positive	0.3	GKGGKGLGKGGAKacR
768.947	2	Positive	0.3	GKGGKGLGKacGGAKR
768.947	2	Positive	0.3	GKGGKacGLGKGGAKR
768.947	2	Positive	0.3	GKacGGKGLGKGGAKR
761.939	2	Positive	0.3	GKacGGKGLGKGGAKacR
761.939	2	Positive	0.3	GKGGKacGLGKGGAKacR
761.939	2	Positive	0.3	GKGGKGLGKacGGAKacR
761.939	2	Positive	0.3	GKacGGKGLGKacGGAKR
761.939	2	Positive	0.3	GKGGKacGLGKacGGAKR
761.939	2	Positive	0.3	GKacGGKacGLGKGGAKR
754.93	2	Positive	0.3	GKGGKacGLGKacGGAKacR
754.93	2	Positive	0.3	GKacGGKGLGKacGGAKacR
754.93	2	Positive	0.3	GKacGGKacGLGKGGAKacR
754.93	2	Positive	0.3	GKacGGKacGLGKacGGAKR
747.922	2	Positive	0.3	GKacGGKacGLGKacGGAKacR
517.639	3	Positive	0.3	GKGGKGLGKGGAKR
512.967	3	Positive	0.3	GKGGKGLGKGGAKacR
512.967	3	Positive	0.3	GKGGKGLGKacGGAKR
512.967	3	Positive	0.3	GKGGKacGLGKGGAKR
512.967	3	Positive	0.3	GKacGGKGLGKGGAKR
508.295	3	Positive	0.3	GKacGGKGLGKGGAKacR
508.295	3	Positive	0.3	GKGGKacGLGKGGAKacR
508.295	3	Positive	0.3	GKGGKGLGKacGGAKacR
508.295	3	Positive	0.3	GKacGGKGLGKacGGAKR
508.295	3	Positive	0.3	GKGGKacGLGKacGGAKR
508.295	3	Positive	0.3	GKacGGKacGLGKGGAKR
503.623	3	Positive	0.3	GKGGKacGLGKacGGAKacR
503.623	3	Positive	0.3	GKacGGKGLGKacGGAKacR
503.623	3	Positive	0.3	GKacGGKacGLGKGGAKacR
503.623	3	Positive	0.3	GKacGGKacGLGKacGGAKR
498.951	3	Positive	0.3	GKacGGKacGLGKacGGAKacR
314.214	2	Positive	0.3	KVLR
321.221	2	Positive	0.3	Kme1VLR
300.216	2	Positive	0.3	Kme2VLR
307.224	2	Positive	0.3	Kme3VLR
701.852	2	Positive	0.3	DAVTYTEHAKR
468.237	3	Positive	0.3	DAVTYTEHAKR
969.548	2	Positive	0.3	GKQGGKAR
955.532	2	Positive	0.3	GKQGGKacAR
955.532	2	Positive	0.3	GKacQGGKAR
941.516	2	Positive	0.3	GKacQGGKacAR
842.51	2	Positive	0.3	AKAKTR
1000.56	2	Positive	0.3	AGLQFPVGR
949.474	2	Positive	0.3	KGNYAER
929.506	2	Positive	0.3	DNKKTR
906.552	2	Positive	0.3	HLQLAIR
1412.74	2	Positive	0.3	NDEELNKLLGR
485.278	3	Positive	0.3	GKQGGKAR
478.27	3	Positive	0.3	GKQGGKacAR
478.27	3	Positive	0.3	GKacQGGKAR
471.262	3	Positive	0.3	GKacQGGKacAR
421.759	3	Positive	0.3	AKAKTR
500.783	3	Positive	0.3	AGLQFPVGR
475.241	3	Positive	0.3	KGNYAER
465.257	3	Positive	0.3	DNKKTR
453.78	3	Positive	0.3	HLQLAIR
706.873	3	Positive	0.3	NDEELNKLLGR
1077.1	2	Positive	0.3	AGGKAGKDSGKAKTKAVSR
1070.09	2	Positive	0.3	AGGKacAGKDSGKAKTKAVSR
1070.09	2	Positive	0.3	AGGKAGKacDSGKAKTKAVSR
1070.09	2	Positive	0.3	AGGKAGKDSGKacAKTKAVSR
1063.08	2	Positive	0.3	AGGKAGKacDSGKacAKTKAVSR
1063.08	2	Positive	0.3	AGGKacAGKDSGKacAKTKAVSR
1063.08	2	Positive	0.3	AGGKacAGKacDSGKAKTKAVSR
1056.08	2	Positive	0.3	AGGKacAGKacDSGKacAKTKAVSR
718.403	3	Positive	0.3	AGGKAGKDSGKAKTKAVSR
713.731	3	Positive	0.3	AGGKacAGKDSGKAKTKAVSR
713.731	3	Positive	0.3	AGGKAGKacDSGKAKTKAVSR
713.731	3	Positive	0.3	AGGKAGKDSGKacAKTKAVSR
709.059	3	Positive	0.3	AGGKAGKacDSGKacAKTKAVSR
709.059	3	Positive	0.3	AGGKacAGKDSGKacAKTKAVSR
709.059	3	Positive	0.3	AGGKacAGKacDSGKAKTKAVSR
704.387	3	Positive	0.3	AGGKacAGKacDSGKacAKTKAVSR
729.42	2	Positive	0.3	GGKKKSTKTSR
657.383	2	Positive	0.3	SAKAGVIFPVGR
757.431	2	Positive	0.3	YIKKGHPKYR
814.973	2	Positive	0.3	KLKSIAFPSIGSGR
800.957	2	Positive	0.3	KacLKacSIAFPSIGSGR
471.772	2	Positive	0.3	GKTGGKAR
414.751	2	Positive	0.3	AKAKSR
486.749	2	Positive	0.3	KGHYAER
